# Supplementary material
Source: Springer Nature journal article supplement (https://www.springermedizin.de/resource/supplementary/13023_2009_179_MOESM4_ESM.pdf/9641800)

Patients (n=141)

- Prediagnosis period
- Alive patient
- Dead patient

0 10 20 30 40 50 60 70  
Age, years

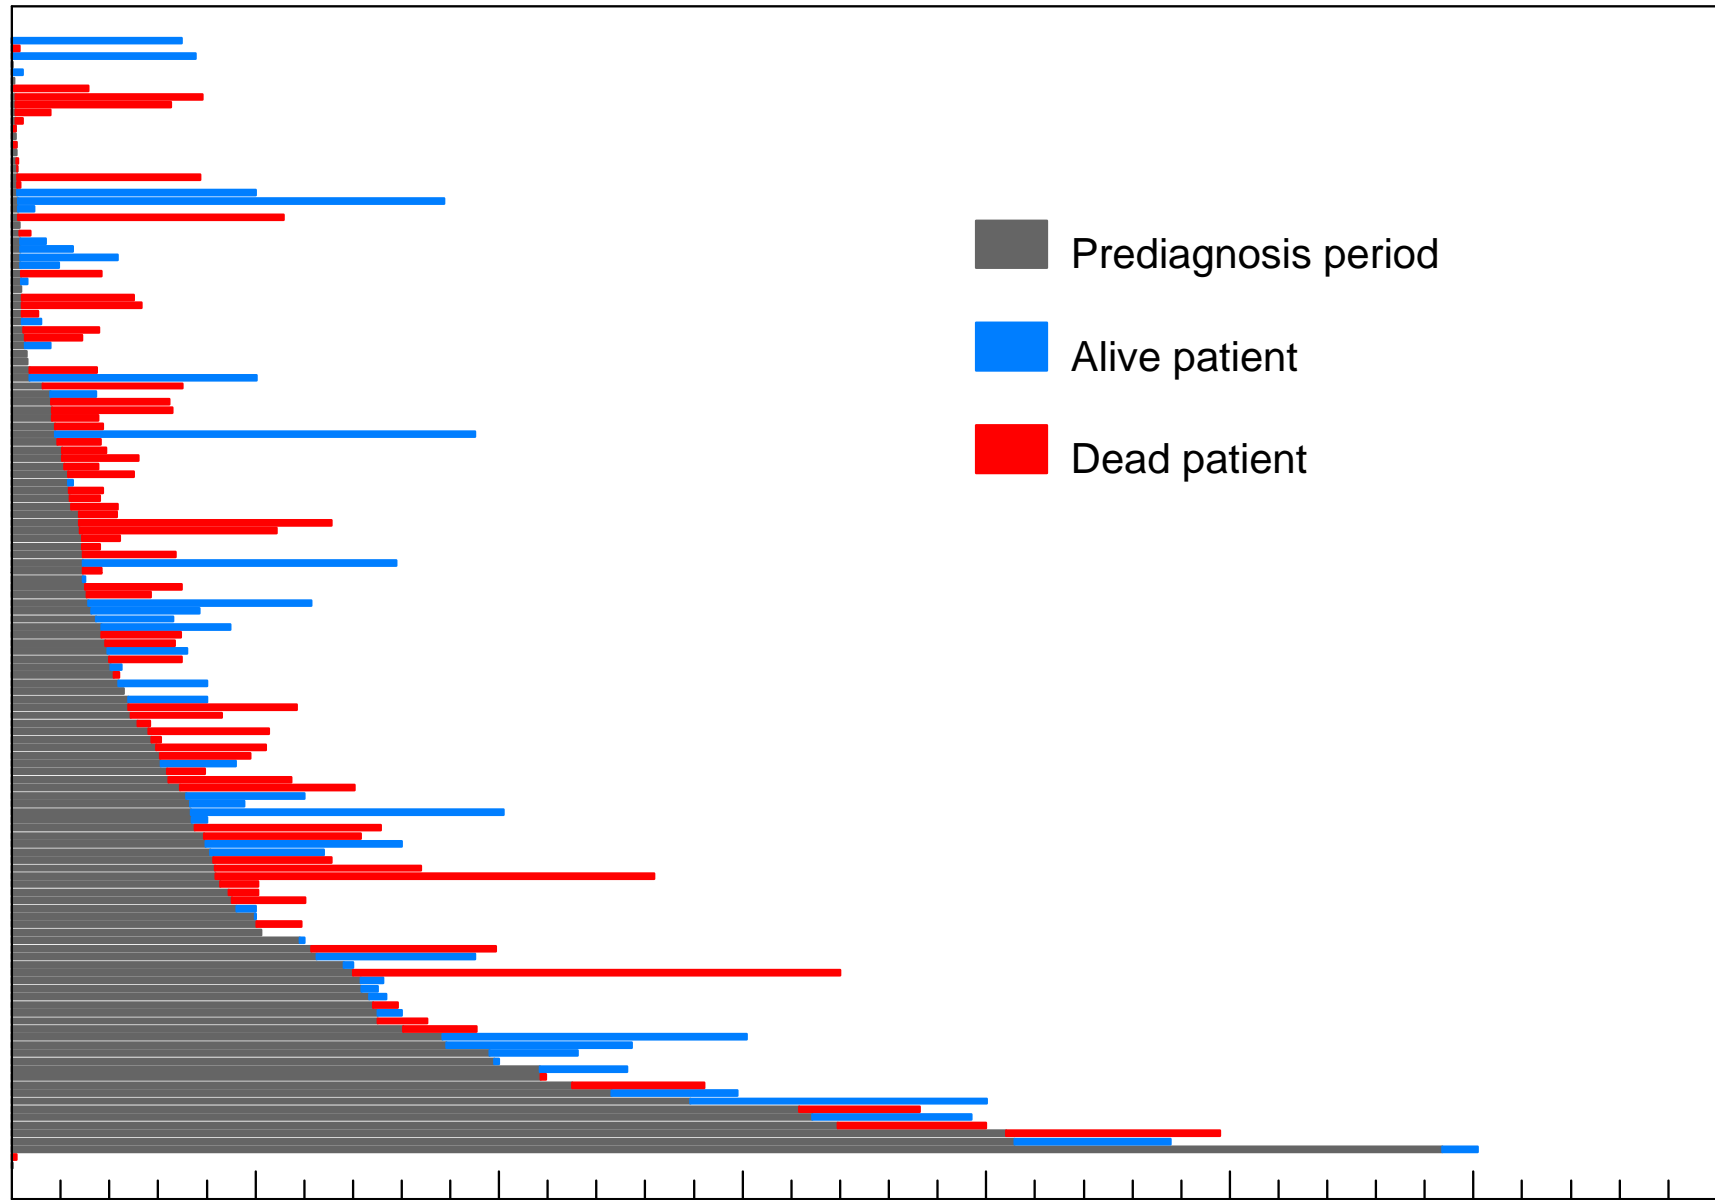

Supplement: MOESM4 [file 9641800]
